# Supplementary material
Source: PubMed Central journal article supplement (PMC3040463)
Supplement: supp_jlb.0610329_4A0610-329_Giordano_suppl_figs_and_methods.pdf [file supp_jlb.0610329_4A0610-329_Giordano_suppl_figs_and_methods.pdf]

# Giordano et. al. Supplemental Data and Methods.

## Figure S1

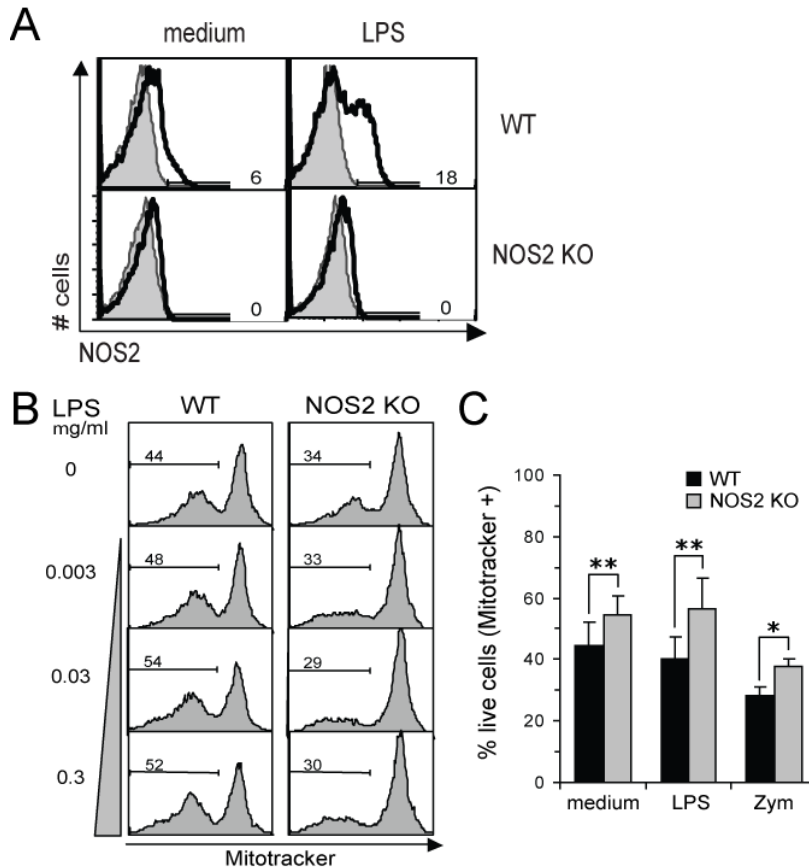

**Figure S1. BM-DCs from NOS2 KO mice have increased survival.** WT and NOS2 KO BM-DCs were treated 24h with medium, 0.3  $\mu\text{g/ml}$  LPS or 100  $\mu\text{g/ml}$  Zymosan. (A) Cells were stained for NOS2 expression. Plots are gated on CD11c<sup>+</sup> cells. Percentages of NOS2<sup>+</sup> cells are shown. Data are representative of >7 independent experiments. (B) Representative flow-cytometric analysis of apoptotic cells detected by mitotracker assay. Percentages of apoptotic cells with ruptured mitochondria are shown. Data are representative of 4 independent experiments. (C) Quantitation of mitotracker analysis from multiple experiments. Live cells were measured as mitotracker<sup>bri</sup> cells. Graph shows means  $\pm$  SD; N=7 for medium and LPS and N=3 for Zymosan; \*  $p < 0.05$  \*\*  $p < 0.01$ .

**Figure S2**

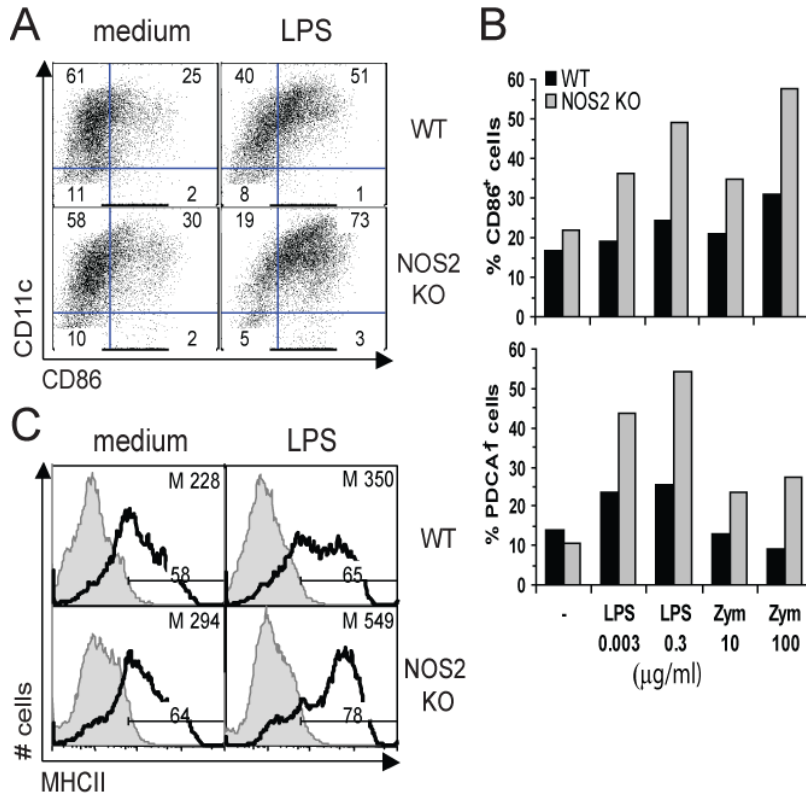

**Figure S2. TLR2 and TLR4 stimulation induce more CD86<sup>+</sup>, PDCA1<sup>+</sup> and MHC class II<sup>+</sup> DCs in NOS2 KO than in WT BM-DC cultures.** WT and NOS2 KO BM-DCs were stimulated for 24h with medium or 0.3  $\mu\text{g/ml}$  LPS (A, C) or the indicated doses of LPS and Zymosan (B). (A) Representative flow cytometric analysis showing the enhanced % of CD11c<sup>+</sup>CD86<sup>+</sup> cells after LPS treatment in NOS2 KO vs. WT DCs. (B) Dose dependent enhancement in CD11c<sup>+</sup>CD86<sup>+</sup> cells (*upper panel*) and CD11c<sup>+</sup>/PDCA1<sup>+</sup> cells (*lower panel*) in NOS2 KO vs. WT DCs is shown. (C) Enhanced % of MHCII<sup>+</sup> cells (*gate*) and MHCII mean fluorescence intensity (*M*) (*thick empty histograms*) in NOS2 KO vs. WT DCs after LPS treatment. In (A) and (C) isotype controls are shown as *grey filled histograms*. In (A-C) data are representative of >4 independent experiments.

**Figure S3**

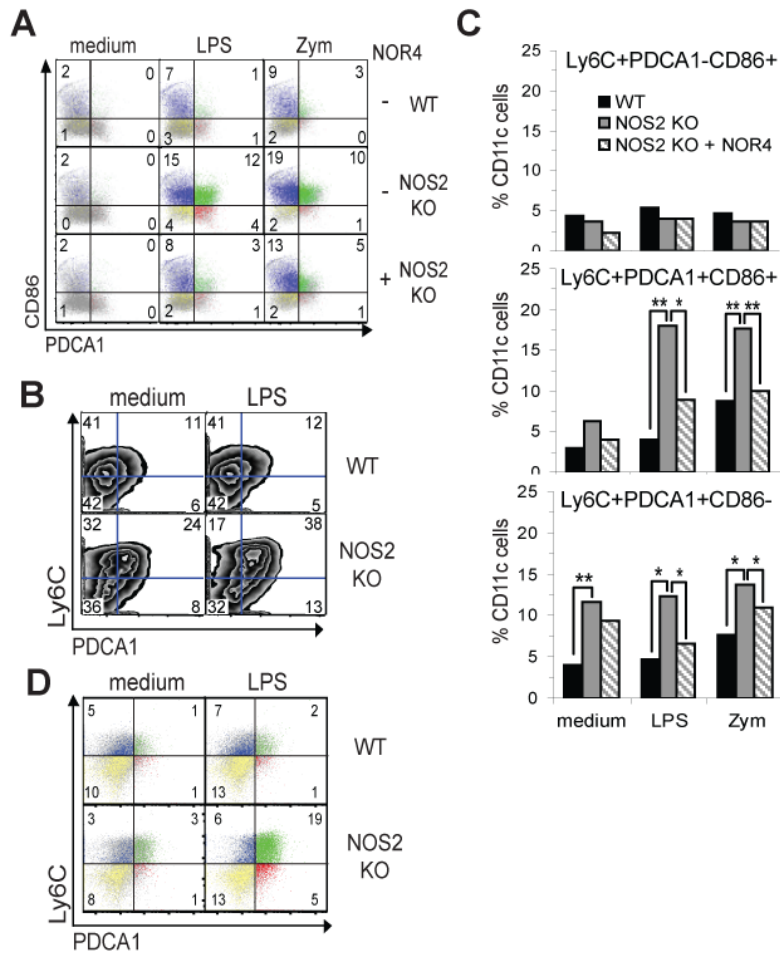

**Figure S3. A Ly6C<sup>hi</sup>PDCA1<sup>+</sup>CD86<sup>+</sup> DC subset is up-regulated in NOS2 KO vs. WT BM-DCs.** WT and NOS2 KO BM-DCs were stimulated for 14h with medium or 0.3  $\mu$ g/ml LPS (A-D) and 100  $\mu$ g/ml Zymosan (A, C). (A, C) NOS2 KO cultures were also treated or not with 100  $\mu$ M NOR4. Plots are gated on CD11c<sup>+</sup> cells. (A) Intracellular IL12/23 expressed by the CD86<sup>+</sup> and PDCA1<sup>+</sup> DC subsets. Colored dots and % in the plots represent IL-12/23-expressing cells from each DC subset: *blue*, CD86<sup>+</sup>PDCA1<sup>-</sup>; *green*, CD86<sup>+</sup>PDCA1<sup>+</sup>; *red*, CD86<sup>-</sup>PDCA1<sup>+</sup>; *yellow*, CD86<sup>-</sup>PDCA1<sup>-</sup>. (B) Enhanced Ly6C<sup>+</sup>PDCA1<sup>+</sup>DCs in NOS2 KO cultures. (C) After TLR stimulation the up-regulation of Ly6C<sup>+</sup>PDCA1<sup>+</sup>CD86<sup>+</sup> and Ly6C<sup>+</sup>PDCA1<sup>+</sup>CD86<sup>-</sup> DCs in NOS2 KO cultures is reverted to the WT phenotype by the addition of NOR4. Graph shows means; N=3; \**p*<0.05 \*\**p*<0.01. (D) LPS stimulation induces enhanced TNF $\alpha$  expression by NOS2 KO Ly6C<sup>+</sup>PDCA1<sup>+</sup>DC subset. Colored dots and % in the plots represent TNF $\alpha$ -expressing cells from each DC subset: *blue*, Ly6C<sup>+</sup>PDCA1<sup>-</sup>; *green*, Ly6C<sup>+</sup>PDCA1<sup>+</sup>; *red*, Ly6C<sup>-</sup>PDCA1<sup>+</sup>; *yellow*, Ly6C<sup>-</sup>PDCA1<sup>-</sup>. In A, B and D, data are representative of  $\geq 3$  independent experiments.

**Figure S4**

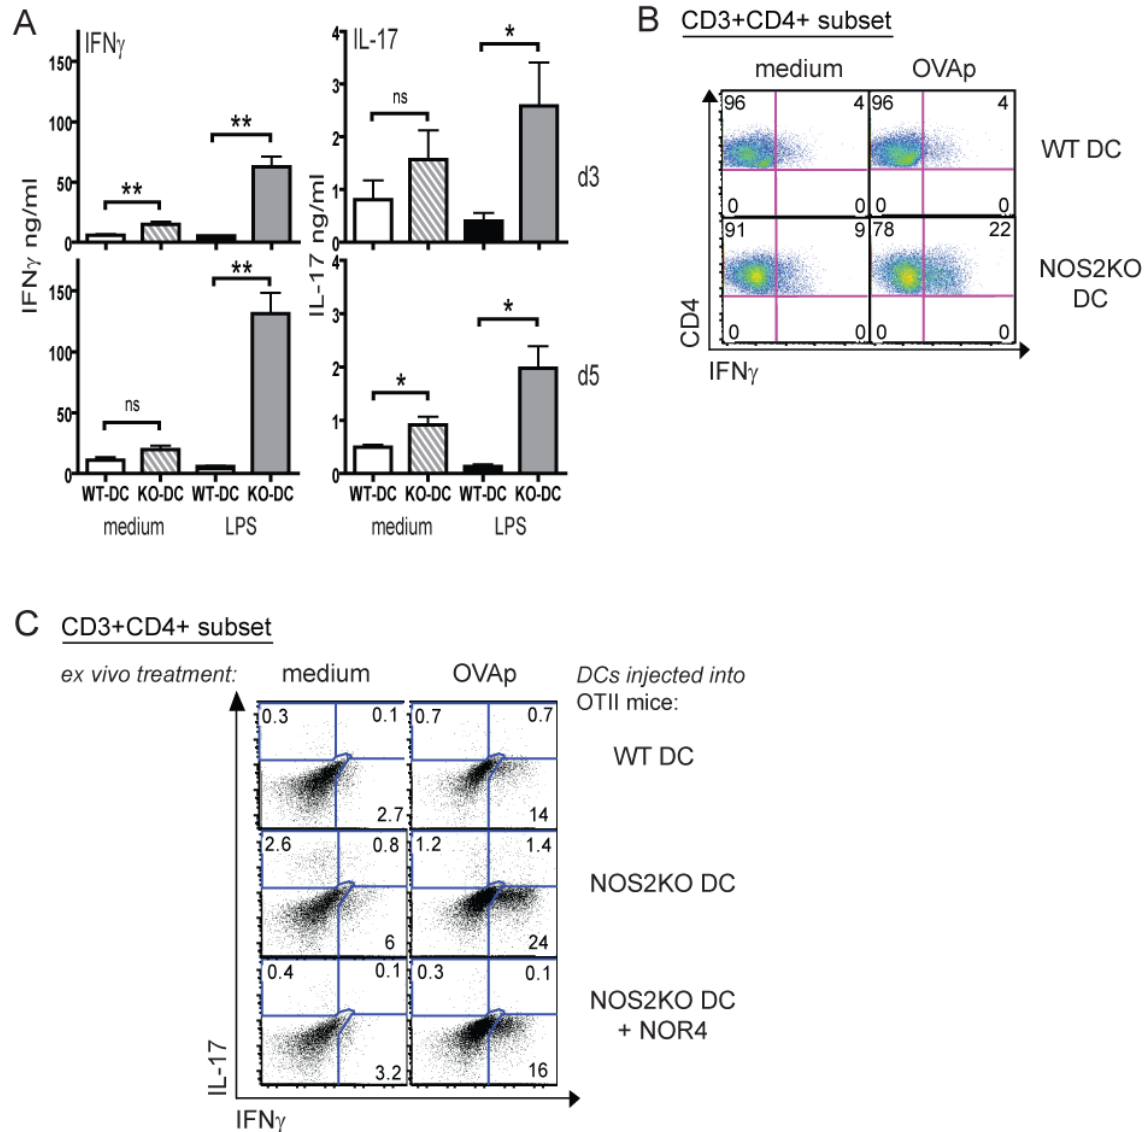

**Figure S4. NOS2 KO DCs compared to WT DCs induce CD4<sup>+</sup> T cells to produce more IFN $\gamma$  and IL-17 *in vitro* and *in vivo*.** (A, B) NOS2 KO or WT BM-DCs were co-cultured for 5 days with WT CD4<sup>+</sup> T cells in medium containing anti-CD3 only or anti-CD3 + LPS. (A) IFN $\gamma$  and IL17 released in the medium at day 3 and day 5 were measured by ELISA. Data were analyzed with Two-tailed Paired Student's *t*-test and are represented as means  $\pm$  SD; N=3; \**p* < 0.05, \*\**p* < 0.01. (B) At day 3, IFN $\gamma$  produced by CD4<sup>+</sup> T cells was detected by intracellular staining. Plots are gated on CD3<sup>+</sup>CD4<sup>+</sup> cells. (C) BM-DCs from WT or NOS2 KO mice were treated for 18h with OVAp plus LPS, in absence or presence of 100 $\mu$ M NOR4 for NOS2 KO DCs, then injected i.p. into OTII T cell receptor Tg mice. Spleens were harvested from mice 5 days after injection and splenocytes cultured for 2 days in medium only or in presence of OVAp and restimulated for 5h with Brefeldin A plus PMA/Ionomycin. IFN $\gamma$  and IL-17 were detected by intracellular staining. Plots are gated on CD3<sup>+</sup>CD4<sup>+</sup> cells. In B and C data are representative of 3 independent experiments.

## Supplemental Methods

IFN $\gamma$  and IL-17 intracellular staining of CD4<sup>+</sup> T cells in co-cultures with WT and NOS2 KO BM-DCs (Fig. S4 B), and after *in vivo* priming of OTII mice with WT or NOSKO DCs (Fig S4 C), cells were then stained with PECy5-anti-CD3 (145-2C11) and APC-anti-CD4 (RM4-5) (eBioscience, San Diego, CA, USA), fixed and permeabilized using BD Cytofix/Cytoperm (BD Bioscience, San Jose, CA, USA), followed by FITC-anti-IFN $\gamma$  (XMG1.2; eBioscience, San Diego, CA, USA), PE-anti-IL-17 (TC11-18H10; BD Bioscience, San Jose, CA, USA). Fluorescence acquisition was done on LSRII FACScan analyzer (Becton Dickinson, Franklin Lakes, NJ, USA) using FACSDiva software and data analysis was performed with FlowJo software.
